# Supplementary material for: Antimicrobial Peptide TP4 Targets Mitochondrial Adenine Nucleotide Translocator 2
Source: MDPI journal article supplement (doi:10.3390/md18080417), 2020-08-09

# MASCOT Search Results

## Protein View: ADT2\_HUMAN

ADP/ATP translocase 2 OS=Homo sapiens GN=SLC25A5 PE=1 SV=7

Database: SwissProt  
Score: 296  
Monoisotopic mass (M<sub>r</sub>): 33059  
Calculated pI: 9.71  
Taxonomy: [Homo sapiens](#)

Sequence similarity is available as [an NCBI BLAST search of ADT2\\_HUMAN against nr.](#)

### Search parameters

MS data file: A2018042404.mgf  
Enzyme: Trypsin: cuts C-term side of KR unless next residue is P.  
Fixed modifications: [Carbamidomethyl \(C\)](#)  
Variable modifications: [Deamidated \(NQ\)](#), [Oxidation \(M\)](#)

### Protein sequence coverage: 29%

Matched peptides shown in **bold red**.

1 MTDAAVSFAK **DFLAGGVAAA** **ISK**TAVAPIE RVKLLQVQH ASKQITADEQ  
51 YKGIIDCVVR **IPKEQGVLSF** **WRGNLANVIR** YFPTQALNFA FDKYKQIFL  
101 GGVDKRTQFW LYFAGNLASG GAAGATSLCF VYPLDFARTR **LAADVKGAGA**  
151 **ERFRGLGDC** LVKIYKSDGI KGLYQGFNVV VQGIIYRAA YFGIYDTAKG  
201 MLFDPKNTTHI VISWMIAQTV TAVAGLTSYP FDTVRRRMM QSGRK**GT**DTIM  
251 **YGT**GLDCWRK IARDEGGKAF **FG**AWSNVLR GMGGAFLVL YDEIKKYT

Unformatted sequence string: [298 residues](#) (for pasting into other applications).

Sort by ☒ residue number ☐ increasing mass ☐ decreasing mass  
Show ☒ matched peptides only ☐ predicted peptides also

| Query                 | Start - End | Observed | Mr(expt)  | Mr(calc)  | ppm    | M | Score | Expect   | Rank | U | Peptide                             |
|-----------------------|-------------|----------|-----------|-----------|--------|---|-------|----------|------|---|-------------------------------------|
| <a href="#">12204</a> | 11 - 23     | 610.3377 | 1218.6607 | 1218.6608 | -0.066 | 0 | 38    | 0.0019   | 1    | U | K.DFLAGGVAAAISK.T                   |
| <a href="#">9768</a>  | 24 - 31     | 428.7494 | 855.4843  | 855.4814  | 3.38   | 0 | 31    | 0.0068   | 1    |   | K.TAVAPIER.V                        |
| <a href="#">13621</a> | 61 - 72     | 487.2721 | 1458.7944 | 1458.7983 | -2.72  | 1 | 58    | 1.6e-005 | 1    | U | R.IPKEQGVLSFWR.G                    |
| <a href="#">9769</a>  | 73 - 80     | 428.7534 | 855.4923  | 855.4926  | -0.33  | 0 | 47    | 0.0001   | 1    |   | R.GNLANVIR.Y                        |
| <a href="#">8547</a>  | 141 - 147   | 673.3874 | 672.3801  | 672.3806  | -0.77  | 0 | 42    | 0.00068  | 1    |   | R.LAADVGK.A                         |
| <a href="#">8548</a>  | 141 - 147   | 673.3879 | 672.3806  | 672.3806  | -0.039 | 0 | 46    | 0.00029  | 1    |   | R.LAADVGK.A                         |
| <a href="#">11852</a> | 141 - 152   | 386.5461 | 1156.6164 | 1156.6200 | -3.11  | 1 | 38    | 0.0024   | 1    | U | R.LAADVGKAGAEER.E                   |
| <a href="#">11853</a> | 141 - 152   | 579.3182 | 1156.6219 | 1156.6200 | 1.66   | 1 | 42    | 0.00057  | 1    | U | R.LAADVGKAGAEER.E                   |
| <a href="#">12622</a> | 153 - 163   | 431.8909 | 1292.6509 | 1292.6547 | -2.97  | 1 | 31    | 0.014    | 1    | U | R.EFRGLGDCLVK.I                     |
| <a href="#">15634</a> | 245 - 259   | 606.2825 | 1815.8258 | 1815.8284 | -1.45  | 1 | 63    | 5.4e-006 | 1    | U | R.KGTDTIMYTGTLDCWR.K                |
| <a href="#">15161</a> | 246 - 259   | 852.8666 | 1703.7186 | 1703.7284 | -5.73  | 0 | 38    | 0.00056  | 1    | U | K.GTDTIMYTGTLDCWR.K + Oxidation (M) |
| <a href="#">9873</a>  | 273 - 280   | 451.7442 | 901.4738  | 901.4770  | -3.49  | 0 | 45    | 0.00053  | 1    |   | K.GAWSNVLR.G                        |

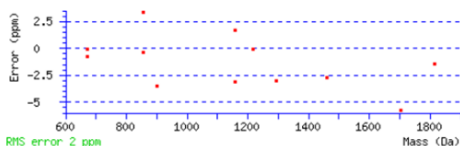

Supplement: s1 [file s1]
