# Supplementary material for: Antimicrobial Peptide TP4 Targets Mitochondrial Adenine Nucleotide Translocator 2
Source: MDPI journal article supplement (doi:10.3390/md18080417), 2020-08-09
Supplement: s1 [file s1]

# Generate full PROCHECK analyses

PROCHECK summary for e857

Ramachandran plot

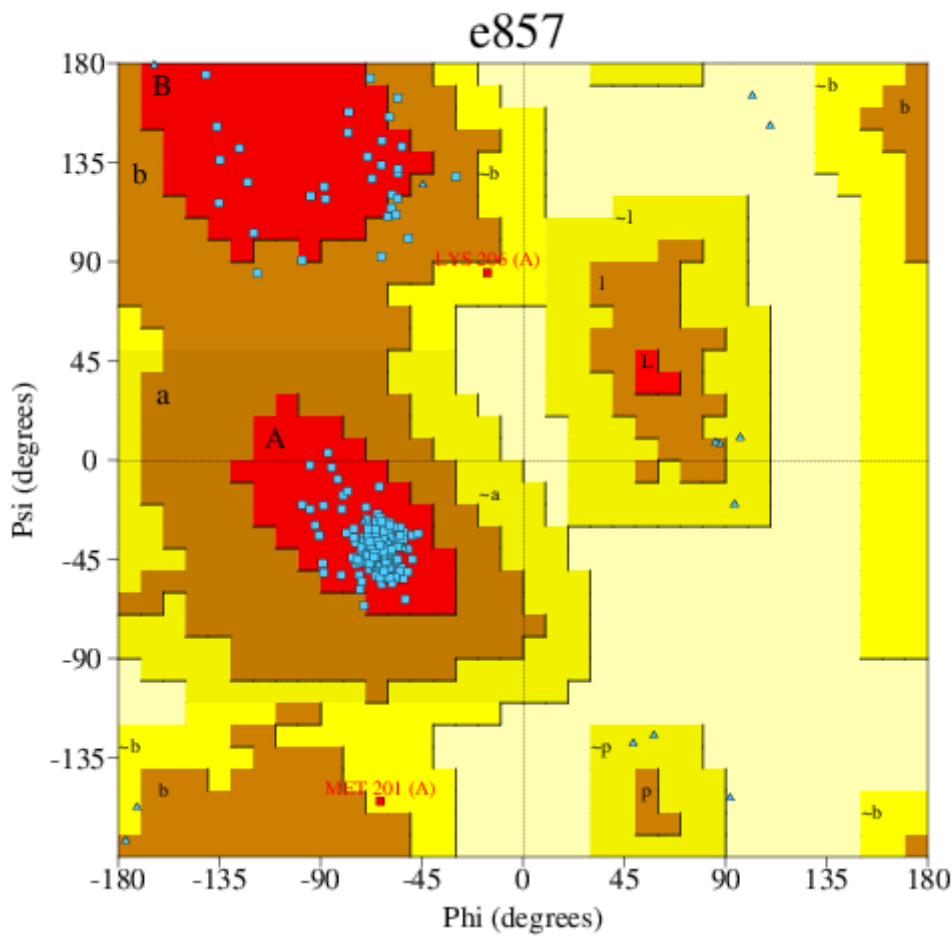

## PROCHECK statistics

### 1. Ramachandran Plot statistics

|                            |           | No. of<br>residues | %-tage |
|----------------------------|-----------|--------------------|--------|
|                            |           | -----              | -----  |
| Most favoured regions      | [A,B,L]   | 246                | 95.3%  |
| Additional allowed regions | [a,b,l,p] | 10                 | 3.9%   |

|                                          |      |        |
|------------------------------------------|------|--------|
| Generously allowed regions [~a,~b,~l,~p] | 2    | 0.8%   |
| Disallowed regions [XX]                  | 0    | 0.0%   |
|                                          | ---- | -----  |
| Non-glycine and non-proline residues     | 258  | 100.0% |
| End-residues (excl. Gly and Pro)         | 2    |        |
| Glycine residues                         | 31   |        |
| Proline residues                         | 7    |        |
|                                          | ---- |        |
| Total number of residues                 | 298  |        |

Based on an analysis of **118** structures of resolution of at least **2.0** Angstroms and *R*-factor no greater than **20.0** a good quality model would be expected to have over **90%** in the most favoured regions [A,B,L].

---

## 2. G-Factors

---

| Parameter                    | Score | Average Score |
|------------------------------|-------|---------------|
| -----                        | ----- | -----         |
| Dihedral angles:-            |       |               |
| Phi-psi distribution         | 0.49  |               |
| Chi1-chi2 distribution       | 0.09  |               |
| Chi1 only                    | -0.10 |               |
| Chi3 & chi4                  | 0.47  |               |
| Omega                        | -0.06 |               |
|                              |       | 0.20          |
|                              |       | =====         |
| Main-chain covalent forces:- |       |               |
| Main-chain bond lengths      | 0.47  |               |
| Main-chain bond angles       | 0.19  |               |
|                              |       | 0.30          |
|                              |       | =====         |
| OVERALL AVERAGE              |       | 0.25          |
|                              |       | =====         |

**G-factors** provide a measure of how **unusual**, or out-of-the-ordinary, a property is.

Values below -0.5\* - unusual  
Values below **-1.0\*\*** - highly unusual

**Important note:** The main-chain bond-lengths and bond angles are compared with the Engh & Huber (1991) ideal values derived from small-molecule data. Therefore, structures refined using different restraints may show apparently large deviations from normality.
