# Supplementary material for: Antimicrobial Peptide TP4 Targets Mitochondrial Adenine Nucleotide Translocator 2
Source: MDPI journal article supplement (doi:10.3390/md18080417), 2020-08-09
Supplement: s1 [file s1]

>> Summary of successfully produced models:

| Filename           | molpdf     | DOPE score   | GA341 score |
|--------------------|------------|--------------|-------------|
| ant2.B99990001.pdb | 1144.87549 | -31677.81055 | 1.00000     |
| ant2.B99990002.pdb | 1023.03369 | -32158.97852 | 1.00000     |
| ant2.B99990003.pdb | 1062.88000 | -32079.35547 | 1.00000     |
| ant2.B99990004.pdb | 1039.41357 | -31974.30273 | 1.00000     |
| ant2.B99990005.pdb | 1028.65491 | -32131.65430 | 1.00000     |
| ant2.B99990006.pdb | 1130.10791 | -32094.13477 | 1.00000     |
| ant2.B99990007.pdb | 1060.92517 | -32045.64453 | 1.00000     |
| ant2.B99990008.pdb | 1043.07666 | -31908.79297 | 1.00000     |
| ant2.B99990009.pdb | 1114.37866 | -31994.77344 | 1.00000     |
| ant2.B99990010.pdb | 1091.30322 | -31639.03711 | 1.00000     |
| ant2.B99990011.pdb | 1130.36694 | -31793.13672 | 1.00000     |
| ant2.B99990012.pdb | 1051.51685 | -32166.15430 | 1.00000     |
| ant2.B99990013.pdb | 987.78619  | -32094.70117 | 1.00000     |
| ant2.B99990014.pdb | 1032.18799 | -32102.73047 | 1.00000     |
| ant2.B99990015.pdb | 1044.15063 | -32347.17773 | 1.00000     |
| ant2.B99990016.pdb | 1213.12744 | -31967.70313 | 1.00000     |
| ant2.B99990017.pdb | 1036.52454 | -32105.75391 | 1.00000     |
| ant2.B99990018.pdb | 1028.71826 | -32066.68164 | 1.00000     |
| ant2.B99990019.pdb | 1301.35095 | -31753.09180 | 1.00000     |
| ant2.B99990020.pdb | 1075.85803 | -32169.12305 | 1.00000     |
| ant2.B99990021.pdb | 997.95160  | -32268.30859 | 1.00000     |
| ant2.B99990022.pdb | 1160.16650 | -32141.12891 | 1.00000     |
| ant2.B99990023.pdb | 963.28333  | -32145.35938 | 1.00000     |
| ant2.B99990024.pdb | 1007.97034 | -32246.53906 | 1.00000     |
| ant2.B99990025.pdb | 1004.13037 | -31975.49414 | 1.00000     |
