# Supplementary material for: Antimicrobial Peptide TP4 Targets Mitochondrial Adenine Nucleotide Translocator 2
Source: MDPI journal article supplement (doi:10.3390/md18080417), 2020-08-09
Supplement: s1 [file s1]

Program: ERRAT2

File: /home/saves/Jobs/5985253/qq\_aaaa.pdb\_errat.logf

Overall quality factor\*\*: 96.552

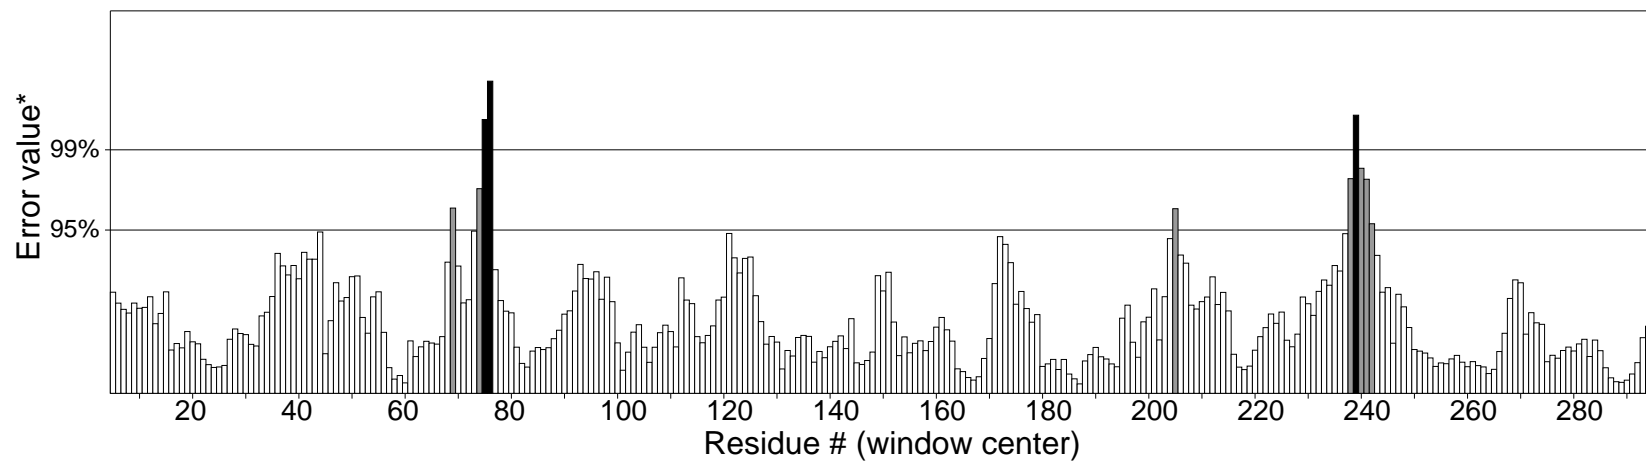

\*On the error axis, two lines are drawn to indicate the confidence with which it is possible to reject regions that exceed that error value.

\*\*Expressed as the percentage of the protein for which the calculated error value falls below the 95% rejection limit. Good high resolution structures generally produce values around 95% or higher. For lower resolutions (2.5 to 3Å) the average overall quality factor is around 91%.
