# Supplementary material for: Antimicrobial Peptide TP4 Targets Mitochondrial Adenine Nucleotide Translocator 2
Source: MDPI journal article supplement (doi:10.3390/md18080417), 2020-08-09
Supplement: s1 [file s1]

```

aln.pos      10      20      30      40      50      60
1OKC      --DQALSFLKDFLAGGVAAAI SKTAVAPIERVKLLQLVQHASKQISAEKQYKGIIDCVVRIPKEQGFL
ant2      MTDAAVSFAKDFLAGGVAAAI SKTAVAPIERVKLLQLVQHASKQITADKQYKGIIDCVVRIPKEQGV
consrvd      * * * * *

```

```

aln.p      70      80      90      100      110      120      130
1OKC      SFWRGNLANVIRYFPTQALNFAFKDKYKQIFLGGVDRHKQFWRYFAGNLASGGAAGATSLCFVYPLDF
ant2      SFWRGNLANVIRYFPTQALNFAFKDKYKQIFLGGVDKRTQFWLYFAGNLASGGAAGATSLCFVYPLDF
consrvd      *****

```

```

aln.pos     140      150      160      170      180      190      200
1OKC      ARTRLAADVGKGAAQREFTGLGNCITKIFKSDGLRGLYQGFNVSVQGIIYRAAYFGVYDTAKGMLPD
ant2      ARTRLAADVGKAGAEREFRGLGDCLVKIYKSDGIKGLYQGFNVSVQGIIYRAAYFGIYDTAKGMLPD
consrvd      *****

```

```

aln.pos     210      220      230      240      250      260      270
1OKC      PKNVHIIVSWMIAQTVTAVAGLVSYPFDTVRRRMMMQSGRKGADIMYTGTVDCWRKIAKDEGPKAFFK
ant2      PKNTHIVISWMIAQTVTAVAGLTSYPFDTVRRRMMMQSGRKGTDIMYTGTLDCWRKIARDEGGKAFFK
consrvd      *** **

```

```

aln.pos     280      290
1OKC      GAWSNVLRGMGGAFLVLYDEI----
ant2      GAWSNVLRGMGGAFLVLYDEIKKYT
consrvd      *****

```
