# Supplementary figures and images for: Antimicrobial Peptide TP4 Targets Mitochondrial Adenine Nucleotide Translocator 2
Source: MDPI journal article supplement (doi:10.3390/md18080417), 2020-08-09

# Results for ant2-model.pdb, chain A (298 aa)

Overall model quality

[HELP](#)

Z-Score: **-4.78**

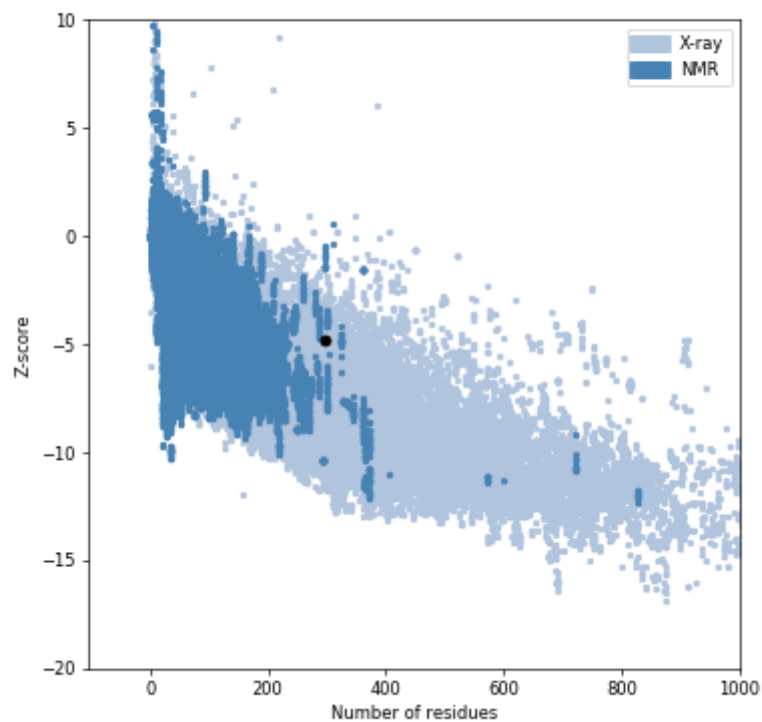

Supplement: s1 [file s1]
